# Supplementary material
Source: publisher figshare collection journal article supplement (https://gsapubs.figshare.com/articles/dataset/_/18737441)
Supplement: Supplementary file 1 [file 1]

## Sheet: Tabelle1
Supplemental Material Data Set S1
Investigated samples, their geographical coordinates, results of zircon thermometry, whole rock geochemistry
and modal data
	SAMPLE Fi 1-19 (Weinsberg I)
	14°57´50´´E, 48°12´16´´N
		Whole rock geochemistry					Ti-in-zircon thermometry for autocrysts
		SiO2	65.73	wt. %			Grain	Ti (ppm)	T(°C)	Correction*
		TiO2	0.74	wt. %			1	19.5178	875.401	0.505808
		Al2O3	16.34	wt. %			2	17.77	865.416	0.503543
		Fe2O3	4.08	wt. %			3	17.6393	864.637	0.503367
		MnO	0.05	wt. %			4	17.1575	861.725	0.502706
		MgO	1.41	wt. %			5	16.7821	859.41	0.502181
		CaO	2.52	wt. %			6	16.6737	858.733	0.502027
		Na2O	3.14	wt. %			7	16.3525	856.707	0.501568
		K2O	5.22	wt. %			8	15.8656	853.572	0.500857
		P2O5	0.3	wt. %			9	15.3015	849.839	0.50001
		LOI	0.78	wt. %			10	15.2298	849.357	0.499901
		Total	100.31	wt. %			11	15.1167	848.592	0.499727
							12	15.0882	848.398	0.499683
		Rb	212	ppm			13	14.4935	844.29	0.498752
		Sr	211	ppm			14	14.2184	842.343	0.49831
		Ba	904	ppm			15	14.0014	840.785	0.497956
		Th	29	ppm			16	13.8907	839.982	0.497774
		La	54	ppm			17	13.5455	837.445	0.497199
		Ce	118	ppm			18	13.2146	834.963	0.496636
		Nd	50	ppm			19	12.8889	832.469	0.49607
		Ga	20	ppm			20	12.753	831.413	0.495831
		Nb	16	ppm			21	12.5927	830.155	0.495545
		Zr	335	ppm			22	12.5893	830.128	0.495539
		Y	28	ppm			23	12.5454	829.782	0.495461
							24	11.618	822.21	0.493743
							25	11.5559	821.685	0.493624
		TZrthermometry					26	11.0109	816.977	0.492556
		M value	1.53				27	10.9932	816.821	0.492521
		TZr	843 °C				28	10.988	816.775	0.492511
		TZr**	862 °C				29	10.2191	809.782	0.490924
		** rMELTS corrected					30	10.1154	808.805	0.490703
		(Schiller and Finger 2019)					31	9.98854	807.6	0.49043
							32	9.70433	804.852	0.489806
							33	8.66989	794.25	0.487402
							34	8.5303	792.74	0.487059
		Modal data					35	8.35329	790.795	0.486618
		25 % k-feldspar					36	7.71809	783.522	0.484968
		30 % plagioclase					37	7.63688	782.556	0.484749
		25 % quartz					38	7.57434	781.807	0.484579
		15 % biotite					39	7.38135	779.461	0.484047
		acc.: zrc, ap, aln, ilm					40	6.92833	773.748	0.482751
	Mineral abbreviations according						41	6.8326	772.501	0.482469
	to Whitney and Evans (2010)						42	5.87225	759.11	0.479431
							43	5.21508	748.847	0.477103
							44	5.13709	747.558	0.476811
							45	4.74092	740.747	0.475266
							46	4.43558	735.163	0.474
							* aTiO2/aSiO2 net correction
							(Schiller and Finger 2019)
	SAMPLE JZ262 (Eisgarn II)
	15°04´43´´E, 48°50´17´´N
		Whole rock geochemistry					Ti-in-zircon thermometry for autocrysts
		SiO2	71.56	wt. %			Grain	Ti (ppm)	T(°C)	Correction*
		TiO2	0.34	wt. %			1	11.8075	822.58	0.480122
		Al2O3	14.7	wt. %			2	11.771	822.263	0.480025
		Fe2O3	2	wt. %			3	11.3347	818.403	0.478848
		MnO	0.01	wt. %			4	9.92694	805.063	0.474777
		MgO	0.49	wt. %			5	9.60246	801.771	0.473773
		CaO	0.81	wt. %			6	7.17285	773.715	0.465212
		Na2O	3.05	wt. %			7	6.77395	768.383	0.463585
		K2O	5.48	wt. %			8	5.04491	741.759	0.455461
		P2O5	0.23	wt. %			9	5.01925	741.31	0.455324
		LOI	1.3	wt. %
		Total	99.97	wt. %			* aTiO2/aSiO2 net correction
							(Schiller and Finger 2019)
		Rb	356	ppm
		Sr	84	ppm
		Ba	36	ppm
		Th		ppm
		La		ppm
		Ce		ppm
		Nd		ppm
		Ga		ppm
		Nb	12	ppm
		Zr	143	ppm
		Y	14	ppm
		TZrthermometry
		M value	1.3
		TZr	791 °C
		TZr**	807 °C
		** rMELTS corrected
		(Schiller and Finger 2019)
		Modal data
		35 % k-feldspar
		25 % plagioclase
		30 % quartz
		5 % biotite
		5 % muscovite
		acc.: and, zrc, ap, mnz, ilm
	SAMPLE Fi 84-08 (Eisgarn III)
	13°49´04´´E, 48°45´18´´N
		Whole rock geochemistry					Ti-in-zircon thermometry for autocrysts
		SiO2	71.1328	wt. %			Grain	Ti (ppm)	T(°C)	Correction*
		TiO2	0.369875	wt. %			1	23.4	889.402	0.536386
		Al2O3	14.9118	wt. %			2	20.97	877.598	0.532958
		Fe2O3	2.19005	wt. %			3	17.69	859.736	0.527769
		MnO	0.0194671	wt. %			4	17.39	857.969	0.527256
		MgO	0.535346	wt. %			5	17.07	856.057	0.526701
		CaO	0.700816	wt. %			6	14.6	840.206	0.522097
		Na2O	2.76433	wt. %			7	14.4	838.827	0.521696
		K2O	5.8304	wt. %			8	12.44	824.406	0.517508
		P2O5	0.360142	wt. %			9	12.38	823.936	0.517371
		LOI	0.914954	wt. %			10	10.55	808.589	0.512914
		Total	99.73	wt. %			11	9.67	800.406	0.510537
							12	8.85	792.201	0.508155
		Rb	420.1	ppm			13	7.4	775.997	0.503448
		Sr	72.8	ppm			14	7.1	772.316	0.50238
		Ba	325.4	ppm
		Th	75.5	ppm			* aTiO2/aSiO2 net correction
		La	50.2	ppm			(Schiller and Finger 2019)
		Ce	130.2	ppm
		Nd	62.1	ppm
		Ga	26.3	ppm
		Nb	12.9	ppm
		Zr	192.7	ppm
		Y	18.7	ppm
		TZr thermometry
		M value	1.2
		TZr	817 °C
		TZr**	843 °C
		** rMELTS corrected
		(Schiller and Finger 2019)
		Modal data
		35 % k-feldspar
		20 % plagioclase
		30 % quartz
		7 % biotite
		5 % muscovite
		acc.: and, zrc, ap, mnz, ilm
	SAMPLE Fi 13-18 Weinsberg II)
	14°52´57´´E, 48°15´50´´N
		Whole rock geochemistry					Ti-in-zircon thermometry for autocrysts
		SiO2	68.01	wt. %			Grain	Ti (ppm)	T(°C)	Correction*
		TiO2	0.5	wt. %			1	18.7756	853.583	0.592658
		Al2O3	15.96	wt. %			2	18.7711	853.561	0.592638
		Fe2O3	2.75	wt. %			3	17.3174	846.064	0.586126
		MnO	0.03	wt. %			4	15.4471	835.6	0.577037
		MgO	0.75	wt. %			5	15.1693	833.956	0.575609
		CaO	1.97	wt. %			6	14.958	832.688	0.574508
		Na2O	3.24	wt. %			7	14.3813	829.151	0.571436
		K2O	6.11	wt. %			8	14.1944	827.979	0.570419
		P2O5	0.24	wt. %			9	14.1875	827.935	0.570381
		LOI	1.23	wt. %			10	13.5844	824.06	0.567016
		Total	100.79	wt. %			11	13.205	821.548	0.564835
							12	12.9464	819.801	0.563318
		Rb	232.1	ppm			13	12.9415	819.767	0.563289
		Sr	173.5	ppm			14	12.6674	817.883	0.561653
		Ba	849.3	ppm			15	12.6085	817.473	0.561297
		Th	35	ppm			16	12.5797	817.272	0.561122
		La	52.7	ppm			17	11.9307	812.64	0.557101
		Ce	111	ppm			18	11.7306	811.169	0.555824
		Nd	52.4	ppm			19	11.4592	809.139	0.554062
		Ga	21.1	ppm			20	11.3388	808.226	0.553269
		Nb	13.5	ppm			21	11.0776	806.216	0.551525
		Zr	222.7	ppm			22	10.2641	799.689	0.545859
		Y	31.9	ppm			23	10.2462	799.541	0.545731
							24	9.82309	795.966	0.542628
							25	9.68856	794.802	0.541618
		TZrthermometry					26	9.67324	794.669	0.541502
		M value	1.53				27	9.63125	794.303	0.541184
		TZr	806 °C				28	9.57528	793.812	0.540758
		TZr**	832 °C				29	9.54929	793.583	0.54056
		** rMELTS corrected					30	9.52777	793.393	0.540395
		(Schiller and Finger 2019)					31	9.4931	793.087	0.540129
							32	8.9889	788.52	0.536166
							33	8.65939	785.416	0.533473
							34	8.6229	785.066	0.533169
		Modal data					35	8.29259	781.842	0.530371
		35 % k-feldspar					36	8.26748	781.592	0.530154
		30 % plagioclase					37	8.15024	780.418	0.529136
		25 % quartz					38	8.03167	779.216	0.528093
		10 % biotite					39	7.6696	775.451	0.524826
		acc.: ms, zrc, ap, mnz, ilm					40	7.24403	770.828	0.520815
							41	6.98194	767.864	0.518244
							42	6.63323	763.772	0.514694
							43	6.54819	762.746	0.513804
							44	6.5467	762.728	0.513789
							45	4.92323	740.572	0.494572
							* aTiO2/aSiO2 net correction
							(Schiller and Finger 2019)
	SAMPLE KJ 18 (Weinsberg II)
	14°17´41´´E, 48°38´33´´N
		Whole rock geochemistry					Ti-in-zircon thermometry for autocrysts
		SiO2	68.5	wt. %			Grain	Ti (ppm)	T(°C)	Correction*
		TiO2	0.512	wt. %			1	16.1912	861.271	0.476197
		Al2O3	14.86	wt. %			2	15.4594	856.57	0.474605
		Fe2O3	3.40128	wt. %			3	13.6941	844.42	0.470491
		MnO	0.064	wt. %			4	13.595	843.701	0.470248
		MgO	0.91	wt. %			5	13.3977	842.255	0.469758
		CaO	1.86	wt. %			6	12.1681	832.82	0.466564
		Na2O	3.1	wt. %			7	11.279	825.492	0.464082
		K2O	4.29	wt. %			8	11.2174	824.967	0.463904
		P2O5	0.2	wt. %			9	10.144	815.403	0.460666
		LOI	0.94	wt. %			10	9.92824	813.38	0.459981
		Total	98.6373	wt. %			11	9.76982	811.871	0.45947
							12	9.62259	810.45	0.458989
		Rb	202	ppm			13	9.22044	806.474	0.457642
		Sr	211	ppm			14	9.13543	805.615	0.457352
		Ba	1015	ppm			15	9.0013	804.246	0.456888
		Th	30.4	ppm			16	8.03036	793.793	0.453349
		La	79.2	ppm			17	7.81304	791.309	0.452508
		Ce	160	ppm			18	7.60431	788.869	0.451681
		Nd	63.6	ppm			19	7.57893	788.568	0.45158
		Ga	24	ppm			20	7.53197	788.01	0.451391
		Nb	14.3	ppm			21	7.44293	786.943	0.451029
		Zr	256	ppm			22	7.31027	785.334	0.450484
		Y	22.1	ppm			23	7.29952	785.203	0.45044
							24	7.29724	785.175	0.45043
							25	7.25982	784.716	0.450275
		TZrthermometry					26	7.09222	782.635	0.44957
		M value		1.34			27	6.98018	781.221	0.449092
		TZr		833 °C			28	6.87526	779.88	0.448637
		TZr**		850 °C			29	6.537	775.435	0.447132
		** rMELTS corrected					30	6.36738	773.132	0.446353
		(Schiller and Finger 2019)					31	6.34905	772.881	0.446268
							32	6.289	772.051	0.445987
							33	6.06409	768.885	0.444914
							34	5.79641	764.985	0.443594
		Modal data					35	4.89012	750.545	0.438705
		25 % k-feldspar					36	4.67309	746.755	0.437421
		30 % plagioclase					37	4.65466	746.427	0.43731
		30 % quartz					38	4.20048	737.959	0.434443
		10 % biotite					39	4.04007	734.783	0.433367
		acc.: ms, zrc, ap, mnz, ilm					40	3.94384	732.826	0.432705
							41	3.5682	724.778	0.42998
							42	3.37796	720.426	0.428506
							* aTiO2/aSiO2 net correction
							(Schiller and Finger 2019)
	SAMPLE KV829 (Weinsberg II)
	13°43´55´´E, 48°50´27´´N
		Whole rock geochemistry					Ti-in-zircon thermometry for autocrysts
		SiO2	68.42	wt. %			Grain	Ti (ppm)	T(°C)	Correction*
		TiO2	0.647	wt. %			1	17.2574	860.087	0.513244
		Al2O3	13.9	wt. %			2	15.2352	847.555	0.50853
		Fe2O3	3.95916	wt. %			3	14.6561	843.712	0.507085
		MnO	0.06	wt. %			4	13.9529	838.872	0.505265
		MgO	0.99	wt. %			5	13.4131	835.018	0.503815
		CaO	2.14	wt. %			6	12.9837	831.86	0.502628
		Na2O	2.95	wt. %			7	12.3347	826.915	0.500768
		K2O	4.69	wt. %			8	12.0151	824.401	0.499822
		P2O5	0.26	wt. %			9	11.7655	822.398	0.499069
		LOI	0.55	wt. %			10	11.6006	821.056	0.498564
		Total	98.5662	wt. %			11	11.1149	817.007	0.497042
							12	10.3374	810.205	0.494483
		Rb	227	ppm			13	10.2597	809.503	0.494219
		Sr	141	ppm			14	10.1967	808.93	0.494004
		Ba	692	ppm			15	9.90124	806.202	0.492978
		Th	29.7	ppm			16	9.89237	806.12	0.492947
		La	55.4	ppm			17	9.65292	803.857	0.492096
		Ce	120	ppm			18	9.57097	803.073	0.491801
		Nd	51	ppm			19	9.50587	802.446	0.491565
		Ga	n.a.	ppm			20	9.44021	801.809	0.491326
		Nb	14.1	ppm			21	9.40982	801.514	0.491215
		Zr	309	ppm			22	9.40429	801.461	0.491195
		Y	31.5	ppm			23	9.40184	801.438	0.491186
							24	9.38936	801.317	0.491141
							25	9.27953	800.239	0.490736
		TZrthermometry					26	9.25713	800.019	0.490653
		M value	1.51				27	8.66066	793.955	0.488372
		TZr	837 °C				28	8.56637	792.965	0.488
		TZr**	851 °C				29	8.56299	792.931	0.487987
		** rMELTS corrected					30	8.50817	792.352	0.487769
		(Schiller and Finger 2019)					31	8.48321	792.087	0.48767
							32	8.47632	792.015	0.487643
							33	8.4124	791.334	0.487386
							34	8.39756	791.176	0.487327
		Modal data					35	8.21944	789.248	0.486602
		25 % k-feldspar					36	7.979	786.59	0.485602
		30 % plagioclase					37	7.63871	782.709	0.484143
		30 % quartz					38	7.62701	782.575	0.484092
		10 % biotite					39	6.96178	774.537	0.481069
		acc.: ms, zrc, ap, mnz, ilm					40	6.81936	772.735	0.480391
							41	6.7172	771.422	0.479898
							42	6.63644	770.373	0.479503
							43	6.56529	769.44	0.479152
							44	6.44715	767.871	0.478562
							45	6.28233	765.64	0.477723
							46	6.03807	762.241	0.476445
							47	5.37215	752.346	0.472724
							48	5.30927	751.361	0.472353
							49	5.25847	750.558	0.472051
							50	4.09186	729.986	0.464314
							51	3.97044	727.571	0.463406
							52	3.50536	717.693	0.459691
							53	2.67604	696.92	0.451879
							54	2.45893	690.582	0.449495
							* aTiO2/aSiO2 net correction
							(Schiller and Finger 2019)
	SAMPLE Fi 15 85 (Weinsberg III)
	14°41´47´´E, 48°19´42´´N
		Whole rock geochemistry					Ti-in-zircon thermometry for autocrysts
		SiO2	69.78	wt. %			Grain	Ti (ppm)	T(°C)	Correction*
		TiO2	0.62	wt. %			1	23.2	895.841	0.503172
		Al2O3	13.95	wt. %			2	20.81	883.279	0.496817
		Fe2O3	3.8	wt. %			3	18.31	868.833	0.489509
		MnO	0.06	wt. %			4	17.64	864.693	0.487414
		MgO	0.71	wt. %			5	16.8	859.32	0.484695
		CaO	1.58	wt. %			6	14.51	843.482	0.476683
		Na2O	2.69	wt. %			7	14.18	841.035	0.475445
		K2O	5.51	wt. %			8	12.2	825.304	0.467486
		P2O5	0.19	wt. %			9	8.71	791.62	0.450444
		LOI	1.03	wt. %			10	7.11	772.309	0.440675
		Total	99.92	wt. %			11	6.64	765.96	0.437462
		Rb	271	ppm			* aTiO2/aSiO2 net correction
		Sr	136	ppm			(Schiller and Finger 2019)
		Ba	678	ppm
		Th	33	ppm
		La	85	ppm
		Ce	174	ppm
		Nd	71	ppm
		Ga
		Nb	20	ppm
		Zr	324	ppm
		Y	36	ppm
		TZr thermometry
		M value	1.43
		TZr	848 °C
		TZr**	855 °C
		** rMELTS corrected
		(Schiller and Finger 2019)
		Modal data
		30 % k-feldspar
		25 % plagioclase
		30 % quartz
		10 % biotite
		acc.: ms, zrc, ap, mnz, ilm
	SAMPLE Fi 20-86 (Weinsberg III)
	14°02´33´´E, 48°24´52´´N
		Whole rock geochemistry					Ti-in-zircon thermometry for autocrysts
		SiO2	60.63	wt. %			Grain	Ti (ppm)	T(°C)	Correction*
		TiO2	1.032	wt. %			1	27.22	917.422	0.49236
		Al2O3	17.34	wt. %			2	27.1	916.988	0.491948
		Fe2O3	6.10412	wt. %			3	25.59	911.359	0.486753
		MnO	0.085	wt. %			4	23.92	904.732	0.480991
		MgO	1.48	wt. %			5	23.2	901.73	0.478505
		CaO	3.39	wt. %			6	22.24	897.578	0.475193
		Na2O	3.49	wt. %			7	22.11	897.002	0.474745
		K2O	5.23	wt. %			8	20.26	888.417	0.468389
		P2O5	0.369	wt. %			9	19.84	886.359	0.466953
		LOI	0.73	wt. %			10	19.77	886.012	0.466714
		Total	99.8801	wt. %			11	19.01	882.161	0.464127
							12	18.75	880.809	0.463246
		Rb	161	ppm			13	18.24	878.101	0.461522
		Sr	330	ppm			14	17.87	876.089	0.460276
		Ba	2320	ppm			15	17.79	875.648	0.460008
		Th	20	ppm			16	15.12	859.711	0.451199
		La	62	ppm			17	14.98	858.801	0.450747
		Ce	138	ppm			18	13.87	851.283	0.447211
		Nd	72	ppm			19	10.97	828.547	0.438434
		Ga	21	ppm			20	6.98	785.94	0.427668
		Nb	28	ppm
		Zr	670	ppm			* aTiO2/aSiO2net correction
		Y	27	ppm			(Schiller and Finger 2019)
		TZrthermometry
		M value	1.77
		TZr	893 °C
		TZr**	919 °C
		** rMELTS corrected
		(Schiller and Finger 2019)
		Modal data
		25 % k-feldspar
		40 % plagioclase
		20 % quartz
		15 % biotite
		acc.: opx, zrc, ap, aln, ilm
	SAMPLE SD 24 17 (Weinsberg III)
	13°54´16´´E, 48°33´01´´N
		Whole rock geochemistry					Ti-in-zircon thermometry for autocrysts
		SiO2	67.71	wt. %			Grain	Ti (ppm)	T(°C)	Correction*
		TiO2	0.72	wt. %			1	20.45	879.937	0.509132
		Al2O3	15.29	wt. %			2	20.18	878.586	0.508428
		Fe2O3	3.59	wt. %			3	18.94	872.179	0.50509
		MnO	0.04	wt. %			4	16.18	856.558	0.496951
		MgO	0.88	wt. %			5	15.44	851.993	0.494573
		CaO	2.28	wt. %			6	15.26	850.855	0.49398
		Na2O	3.2	wt. %			7	15.03	849.385	0.493214
		K2O	5.57	wt. %			8	14.82	848.026	0.492506
		P2O5	0.25	wt. %			9	14.34	844.858	0.490856
		LOI	1.08	wt. %			10	14.25	844.254	0.490541
		Total	100.61	wt. %			11	14.2	843.918	0.490366
							12	12.92	834.938	0.485688
		Rb	179.1	ppm			13	12.78	833.911	0.485154
		Sr	209.6	ppm			14	12.59	832.502	0.48442
		Ba	1103.2	ppm			15	12.31	830.394	0.483321
		Th	37.8	ppm			16	11.44	823.575	0.47977
		La	86.3	ppm			17	11.36	822.926	0.479432
		Ce	167.1	ppm			18	11.3	822.437	0.479177
		Nd	72.3	ppm			19	11.12	820.957	0.478407
		Ga	20.6	ppm			20	11.06	820.459	0.478147
		Nb	15	ppm			21	10.58	816.393	0.476029
		Zr	401.1	ppm			22	10.35	814.389	0.474986
		Y	23.9	ppm			23	9.97	810.995	0.473219
							24	9.97	810.995	0.473219
							25	9.87	810.084	0.472744
		TZr thermometry					26	8.67	798.498	0.46671
		M value	1.56				27	8.58	797.575	0.46623
		TZr	856 °C				28	7.84	789.666	0.462112
		TZr**	870 °C				29	7.68	787.873	0.461178
		** rMELTS corrected					30	7.08	780.858	0.457526
		(Schiller and Finger 2019)					31	6.89	778.532	0.456315
							32	6.81	777.537	0.455796
							33	6.57	774.489	0.45421
							34	5.92	765.737	0.449653
		Modal data					35	5.05	752.65	0.44284
		30 % k-feldspar					36	4.8	748.537	0.44
		30 % plagioclase
		25 % quartz					* aTiO2/aSiO2 net correction
		10 % biotite					(Schiller and Finger 2019)
		acc.: opx, zrc, ap, aln, ilm
	SAMPLE SD 38 11 (LOG)
	14°11´58´´E, 48°23´27´´N
		Whole rock geochemistry					Ti-in-zircon thermometry for autocrysts
		SiO2	64.9346	wt. %			Grain	Ti (ppm)	T(°C)	Correction*
		TiO2	1.13799	wt. %			1	38.43	948.261	0.542384
		Al2O3	15.2293	wt. %			2	38.32	947.925	0.542258
		Fe2O3	4.9082	wt. %			3	36.75	943.044	0.540428
		MnO	0.0692689	wt. %			4	36.62	942.632	0.540274
		MgO	1.47444	wt. %			5	35.75	939.845	0.539229
		CaO	2.70149	wt. %			6	31.35	924.836	0.533603
		Na2O	2.64211	wt. %			7	31.15	924.114	0.533333
		K2O	5.52172	wt. %			8	28.2	912.99	0.529163
		P2O5	0.672898	wt. %			9	28.16	912.833	0.529104
		LOI	1.13799	wt. %			10	24.9	899.351	0.524051
		Total	100.43	wt. %			11	21.62	884.23	0.518383
							12	19.52	873.521	0.514369
		Rb	166.2	ppm			13	19.32	872.452	0.513968
		Sr	281	ppm			14	17.65	863.151	0.510481
		Ba	1462.5	ppm			15	15.01	846.839	0.504367
		Th	12.3	ppm			16	13.1	833.479	0.499359
		La	79.4	ppm			17	12.42	828.329	0.497428
		Ce	155.1	ppm			18	12.37	827.941	0.497283
		Nd	63	ppm			19	9.86	806.55	0.489264
		Ga	21.7	ppm			20	9.65	804.56	0.488518
		Nb	29.5	ppm
		Zr	653.8	ppm			* aTiO2/aSiO2 net correction
		Y	39.9	ppm			(Schiller and Finger 2019)
		TZrthermometry
		M value		1.62
		TZr		903 °C
		TZr**		948 °C
		** rMELTS corrected
		(Schiller and Finger 2019)
		Modal data
		25 % k-feldspar
		30 % plagioclase
		25 % quartz
		15 % biotite
		acc.: zrc, ap, aln, ilm
	SAMPLE HL14a (LOG)
	14°27´14´´E, 48°30´43´´N
		Whole rock geochemistry					Ti-in-zircon thermometry for autocrysts
		SiO2	70.3	wt. %			Grain	Ti (ppm)	T(°C)	Correction*
		TiO2	0.76	wt. %			1	45.77	975.946	0.522409
		Al2O3	14.14	wt. %			2	43.09	968.787	0.519103
		Fe2O3	3.46	wt. %			3	39.12	957.481	0.513882
		MnO	0.03	wt. %			4	39.03	957.214	0.513759
		MgO	0.6	wt. %			5	34.02	941.485	0.506496
		CaO	0.61	wt. %			6	33.28	939.003	0.505349
		Na2O	2.76	wt. %			7	32.12	935.019	0.503509
		K2O	6.62	wt. %			8	30.74	930.122	0.501248
		P2O5	0.32	wt. %			9	30.44	929.033	0.500745
		LOI	1.37	wt. %			10	29.19	924.401	0.498606
		Total	100.97	wt. %			11	25.61	910.161	0.49203
							12	25.54	909.867	0.491894
		Rb	246	ppm			13	24.84	906.885	0.490517
		Sr	184	ppm			14	21.47	891.476	0.483402
		Ba	1372	ppm			15	21.45	891.379	0.483357
		Th	53	ppm			16	19.88	883.499	0.479718
		La	104	ppm			17	19	878.853	0.477572
		Ce	194	ppm			17	16.44	864.24	0.470824
		Nd	91	ppm
		Ga	17	ppm			* aTiO2/aSiO2 net correction
		Nb	28	ppm			(Schiller and Finger 2019)
		Zr	609	ppm
		Y	30	ppm
		TZrthermometry
		M value	1.36
		TZr	920 °C
		TZr**	927 °C
		** rMELTS corrected
		(Schiller and Finger 2019)
		Modal data
		35 % k-feldspar
		25 % plagioclase
		30 % quartz
		10 % biotite
		acc.: zrc, ap, aln, ilm
	SAMPLE HL34 (LOG)
	14°27´15´´E, 48°30´43´´N
		Whole rock geochemistry					Ti-in-zircon thermometry for autocrysts
		SiO2	62.63	wt. %			Grain	Ti (ppm)	T(°C)	Correction*
		TiO2	1.56	wt. %			1	43.15	958.594	0.561974
		Al2O3	15.4	wt. %			2	43	958.192	0.561761
		Fe2O3	6.32	wt. %			3	40.75	952.017	0.55848
		MnO	0.08	wt. %			4	39.04	947.134	0.555887
		MgO	2.05	wt. %			5	36.62	939.914	0.552051
		CaO	2.91	wt. %			6	36.17	938.528	0.551315
		Na2O	2.93	wt. %			7	35.26	935.682	0.549804
		K2O	4.84	wt. %			8	33.96	931.509	0.547588
		P2O5	0.56	wt. %			9	31.66	923.792	0.543489
		LOI	1.02835	wt. %			10	27.11	907.051	0.5346
		Total	100.308	wt. %			11	25.64	901.144	0.531464
							12	23.9	893.778	0.527554
		Rb	216.9	ppm			13	23.01	889.837	0.525462
		Sr	231.8	ppm			14	22.97	889.657	0.525366
		Ba	1207.2	ppm			15	21.05	880.691	0.520607
		Th	17.3	ppm			16	19.33	872.062	0.516027
		La	67.6	ppm			17	18.23	866.202	0.512917
		Ce	135.4	ppm			18	16.35	855.468	0.507221
		Nd	62.8	ppm
		Ga	20.6	ppm			* aTiO2/aSiO2 net correction
		Nb	28.6	ppm			(Schiller and Finger 2019)
		Zr	652	ppm
		Y	33.3	ppm
		TZr thermometry
		M value	1.68
		TZr	898 °C
		TZr**	904 °C
		** rMELTS corrected
		(Schiller and Finger 2019)
		Modal data
		20 % k-feldspar
		35 % plagioclase
		25 % quartz
		20 % biotite
		acc.: zrc, ap, aln, ilm
	SAMPLE BB3 (LOG)
	14°24'24 "E, 48°28'21"N
		Whole rock geochemistry					Ti-in-zircon thermometry for autocrysts
		SiO2	63.23	wt. %			Grain	Ti (ppm)	T(°C)	Correction*
		TiO2	1.27	wt. %			1	35.5	937	0.533072
		Al2O3	15.72	wt. %			2	23.6	891	0.533072
		Fe2O3	6.13	wt. %			3	23.27	889.474	0.533072
		MnO	0.06	wt. %			4	20.57	876.745	0.52675
		MgO	1.93	wt. %			5	19.77	872.708	0.524744
		CaO	3.24	wt. %			6	17.75	861.873	0.519362
		Na2O	3.27	wt. %			7	15.27	847.068	0.512009
		K2O	4.13	wt. %			8	14.59	842.659	0.509819
		P2O5	0.49	wt. %			9	13.75	836.97	0.506993
		LOI	0.67	wt. %			10	11.84	822.865	0.499987
		Total	100.14	wt. %			11	11.11	816.967	0.497057
							12	10.34	810.382	0.493786
		Rb	193.3	ppm			13	9.46	802.333	0.489788
		Sr	307.4	ppm			14	8.65	794.348	0.485821
		Ba	895.1	ppm			15	8.18	789.421	0.483374
		Th	44.1	ppm			16	6.58	770.637	0.474043
		La	145.6	ppm			17	5.5	755.637	0.466592
		Ce	295.6	ppm			18	4.55	740.216	0.458932
		Nd	113.2	ppm
		Ga	22	ppm			* aTiO2/aSiO2 net correction
		Nb	17	ppm			(Schiller and Finger 2019)
		Zr	553.9	ppm
		Y	38.2	ppm
		TZrthermometry
		M value		1.67
		TZr		881 °C
		TZr**		908 °C
		** rMELTS corrected
		(Schiller and Finger 2019)
		Modal data
		15 % k-feldspar
		40 % plagioclase
		25 % quartz
		20 % biotite
		acc.: zrc, ap, aln, ilm
	SAMPLE Fi 92 81 (LOG)
	13°56´31´´E, 48°27´01´´N
		Whole rock geochemistry					Ti-in-zircon thermometry for autocrysts
		SiO2	67.43	wt. %			Grain	Ti (ppm)	T(°C)	Correction*
		TiO2	0.99	wt. %			1	36.17	936.294	0.561236
		Al2O3	15.37	wt. %			2	29.58	914.564	0.54785
		Fe2O3	5.33	wt. %			3	28.4	910.217	0.545379
		MnO	0.06	wt. %			4	24.42	894.242	0.536891
		MgO	1.91	wt. %			5	24.15	893.075	0.536308
		CaO	2.27	wt. %			6	22.74	886.781	0.533247
		Na2O	3.04	wt. %			7	22.69	886.551	0.533138
		K2O	3.1	wt. %			8	20.65	876.771	0.528678
		P2O5	0.04	wt. %			9	20.45	875.766	0.52824
		LOI	0.43	wt. %			10	19.54	871.077	0.526243
		Total	99.97	wt. %			11	19.44	870.549	0.526024
							12	19.28	869.701	0.525673
		Rb	175.5	ppm			13	18.14	863.463	0.523173
		Sr	253.1	ppm			14	17.78	861.42	0.522386
		Ba	665.2	ppm			15	17.17	857.871	0.521054
		Th	25.8	ppm			16	13.72	835.362	0.513684
		La	52.6	ppm			17	12.63	827.183	0.511467
		Ce	113.1	ppm			18	9.35	798.059	0.505568
		Nd	24.5	ppm			19	5.1	742.193	0.502971
		Ga	22.4	ppm			20	2.46	680.163	0.513519
		Nb	11.9	ppm
		Zr	603.3	ppm			* aTiO2/aSiO2 net correction
		Y	20.2	ppm			(Schiller and Finger 2019)
		TZrthermometry
		M value	1.27
		TZr	927 °C
		TZr**	941 °C
		** rMELTS corrected
		(Schiller and Finger 2019)
		Modal data
		15 % k-feldspar
		35 % plagioclase
		30 % quartz
		20 % biotite
		acc.: ms, zrc, ap, mnz, ilm
	SAMPLE ML 19-01 (FGD)
	13°56´31´´E, 48°27´01´´N
		Whole rock geochemistry					Ti-in-zircon thermometry for autocrysts
		SiO2	63.16	wt. %			Grain	Ti (ppm)	T(°C)	Correction*
		TiO2	0.73	wt. %			1	8.57	787.587	0.5
		Al2O3	17.67	wt. %			2	8.13	783.096	0.5
		Fe2O3	4.11	wt. %			3	7.13	772.086	0.5
		MnO	0.05	wt. %			4	6.34	762.439	0.5
		MgO	2.31	wt. %			5	5.65	753.156	0.5
		CaO	4.34	wt. %			6	5.21	746.729	0.5
		Na2O	4.07	wt. %			7	4.96	742.872	0.5
		K2O	2.07	wt. %			8	4.56	736.349	0.5
		P2O5	0.25	wt. %			9	4.54	736.01	0.5
		LOI	0.92	wt. %			10	4.39	733.431	0.5
		Total	99.68	wt. %			11	4.36	732.906	0.5
							12	4.3	731.847	0.5
		Rb	56	ppm			13	3.98	725.982	0.5
		Sr	501	ppm			14	3.91	724.646	0.5
		Ba	741	ppm			15	3.85	723.485	0.5
		Th	b.d.l.	ppm			16	3.77	721.913	0.5
		La	24	ppm			17	3.28	711.624	0.5
		Ce	46	ppm			18	3.17	709.137	0.5
		Nd	17	ppm			19	3.09	707.283	0.5
		Ga	19	ppm
		Nb	8	ppm
		Zr	180	ppm			* aTiO2/aSiO2 net correction
		Y	15	ppm			(Schiller and Finger 2019)
		TZrthermometry
		M value	1.59754
		TZr	782 °C
		TZr**	796 °C
		** rMELTS corrected
		(Schiller and Finger 2019)
		Modal data
		10% k-feldspar
		50 % plagioclase
		25 % quartz
		15 % biotite
		acc.: zrc, ap, mag, ilm

## Sheet: G49645
Finger, F., et al., 2022, Ultrahigh-temperature granites and a curious thermal eye in the post-collisional South Bohemian batholith of the Variscan orogenic belt (Europe): Geology, https://doi.org/10.1130/G49645.1
